# Supplementary material
Source: Springer Nature journal article supplement (https://www.springermedizin.de/resource/supplementary/12876_2011_696_MOESM2_ESM.pdf/9437558)

**Type III  
(5.7%)**

**Type IV  
(14.3%)**

**Type Ib  
(30.0%)**

**Type II  
(50.0%)**

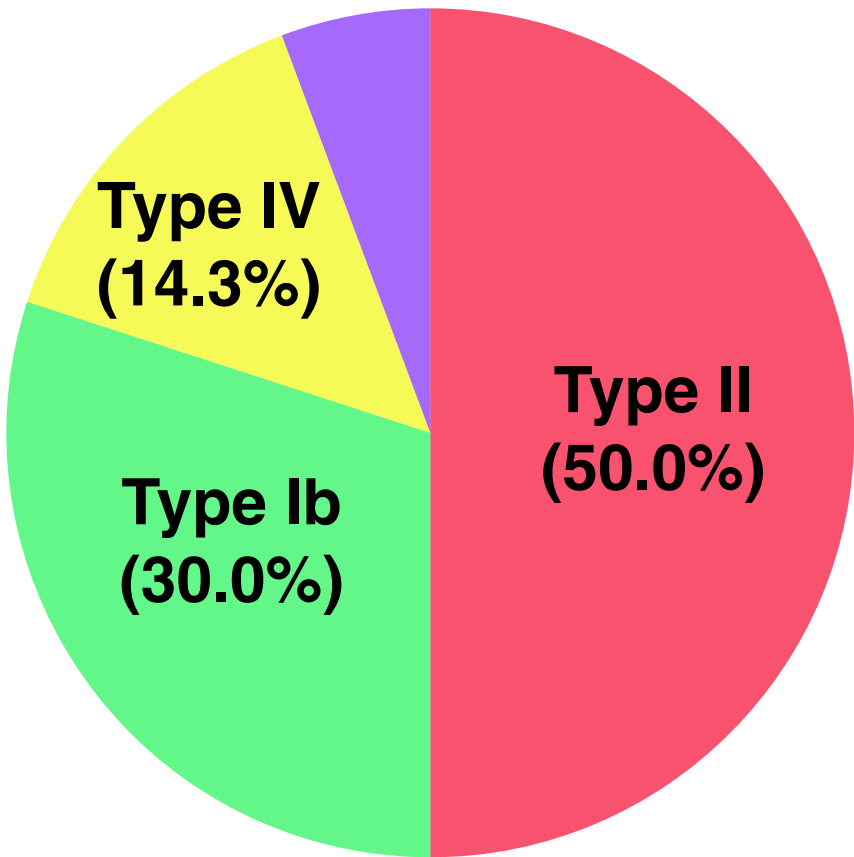

Supplement: MOESM2 [file 9437558]
